# Supplementary material for: An atomically precise all-tert-butylethynide-protected Ag51 superatom nanocluster with color tunability
Source: Royal Society of Chemistry journal article supplement (doi:10.1039/c8nr06399k), 2018-01-01
Supplement: c8nr06399k1.pdf [file c8nr06399k1.pdf]

## Supporting Information

### **An Atomically Precise All-*tert*-Butylethyne-Protected Ag<sub>51</sub> Superatom Nanocluster with Color Tunability**

Guang-Xiong Duan,<sup>†</sup> Lin Tian,<sup>†</sup> Jun-Bo Wen,<sup>†</sup> Lan-Yun Li,<sup>†</sup> Yun-Peng Xie,<sup>†,\*</sup> Xing Lu<sup>†,\*</sup>

*<sup>†</sup>State Key Laboratory of Materials Processing and Die & Mould Technology, School of Materials Science and Engineering, Huazhong University of Science and Technology (HUST), Wuhan 430074, China.*

Email: [xieyp@hust.edu.cn](mailto:xieyp@hust.edu.cn) (Y.-P. Xie); [lux@hust.edu.cn](mailto:lux@hust.edu.cn) (X. Lu).

#### **Experimental Section**

All reagents employed are commercially available and used as received without further purification. <sup>t</sup>BuC≡CAg was prepared according to literature procedure.<sup>S1</sup> Elemental analyses for C, H, and N were performed with a PerkinElmer 2400 CHN elemental analyzer. The Fourier transform infrared (FT-IR) spectra were recorded from KBr pellets in the range 4000–400 cm<sup>-1</sup> on a Bruker VERTEX 70 spectrometer. The transmission electron microscopy (TEM) image of the nanocluster Ag<sub>51</sub> was obtained with Tecnai G2 F30 (FEI, Holland). The Vis-NIR experiments were carried out on a PE Lambda 750S UV-vis-NIR spectrophotometer. Fluorescent spectra were recorded on a FP-6500 fluorescence spectrometer, using 5 mm path length cuvettes. Luminescence lifetimes measurements were recorded with an Edinburgh FLS 980 Lifetime and Steady State Spectrometer. Crystal data of Ag<sub>51</sub> was collected at 100 K using the radiation wavelength at 0.65250 Å with a MarCCD detector at beamline BL17B of the Shanghai Synchrotron Radiation Facility (China). Multi-scan method

was used for absorption corrections. The structures were solved with direct method and were refined with SHELXL-2014.<sup>S2</sup>

### Synthesis of $\text{Ag}_{51}(\text{tBuC}\equiv\text{C})_{32}\text{Cl}$

$\text{tBuC}\equiv\text{CAg}$  (0.1133 g, 0.6 mmol) and dppp (1,3-bis(diphenylphosphino)propane, 0.2475 g, 0.6 mmol) were dissolved in 50 mL of methanol and dichloromethane (1:1) under vigorous stirring. A freshly prepared solution of  $\text{NaBH}_4$  (0.9 mmol in 5 mL methanol) was added. The solution changed from colorless to yellow. After adding 0.5 mL  $\text{Et}_3\text{N}$  solution of  $(\text{Me}_4\text{N})\text{Cl}$  (0.0045 g, 0.039 mmol) and  $\text{tBuPO}_3\text{H}_2$  (0.008 g, 0.058 mmol), the reaction was aged for 15 h at ambient conditions, during which the color further turned dark black green. The mixture was centrifuged for 5 min at 7500 r/min. Slow evaporation of the dark solution afforded the product as black block crystals after one week. Yield: ca. 27% (based on  $\text{tBuC}\equiv\text{CAg}$ ). Elemental analysis (%): calcd for  $\text{C}_{192}\text{H}_{288}\text{ClAg}_{51}$ : C 28.35, H 3.57; found: C 28.64, H 3.91. IR (KBr,  $\text{cm}^{-1}$ ): 2055 ( $\text{C}\equiv\text{C}$ ).

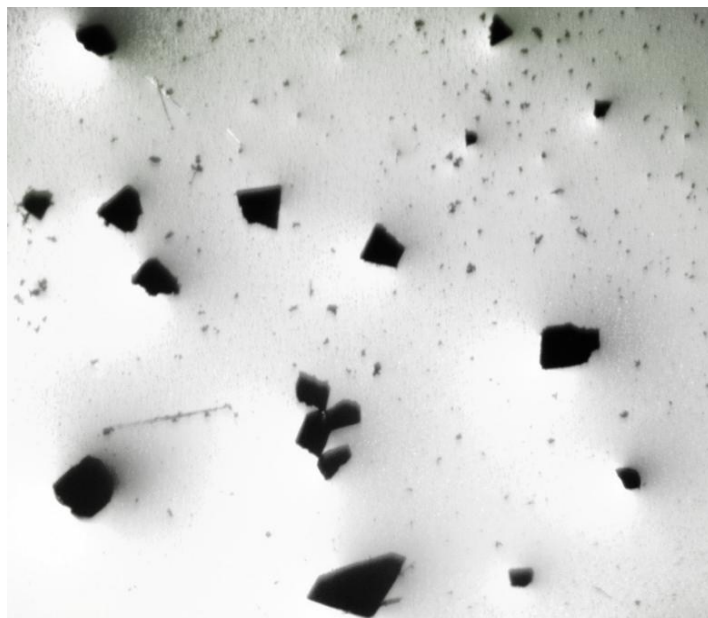

**Figure S1.** The image of  $\text{Ag}_{51}$  (black block) under an optical microscope.

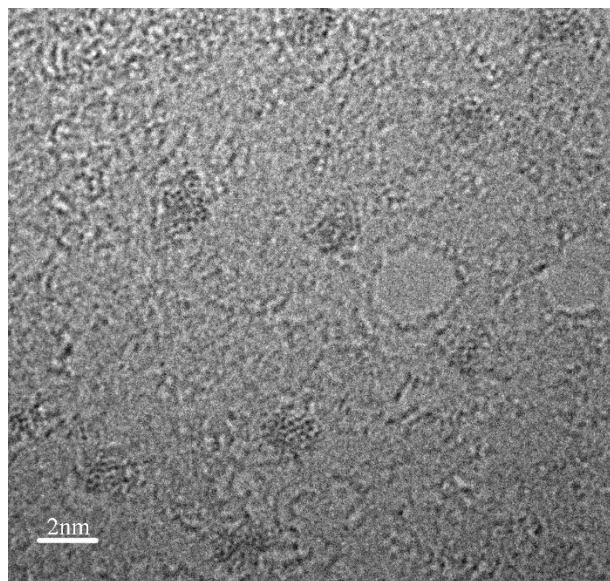

**Figure S2.** HR-TEM micrograph of  $\text{Ag}_{51}$ .

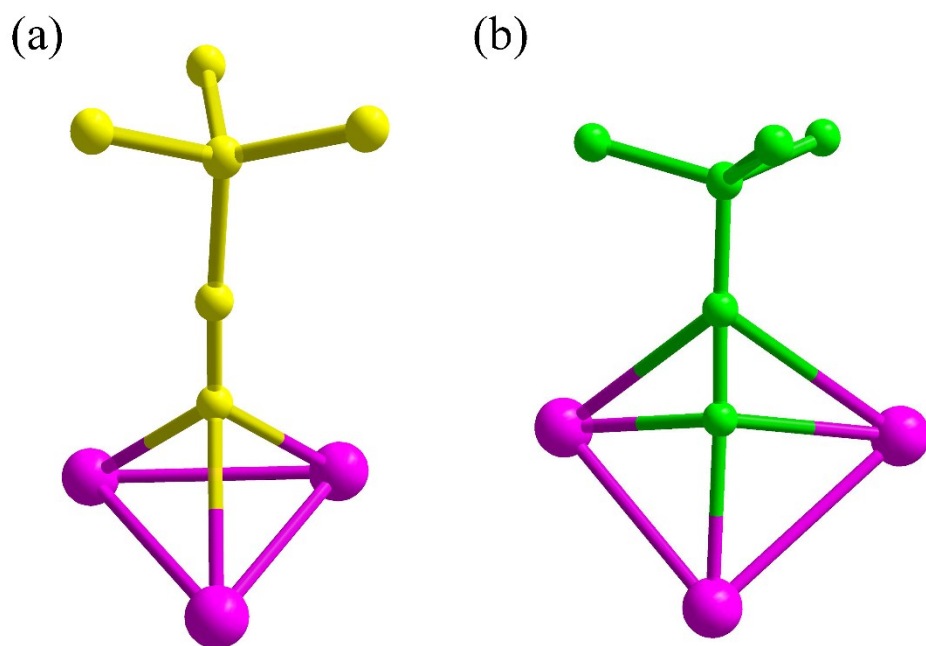

**Figure S3.** Illustration of bonding motifs of  ${}^t\text{BuC}\equiv\text{C}^-$  ligands. (a) Type A. (b) Type B. Color legend: Ag, pink, light blue, dark blue, brown; C, yellow and green.

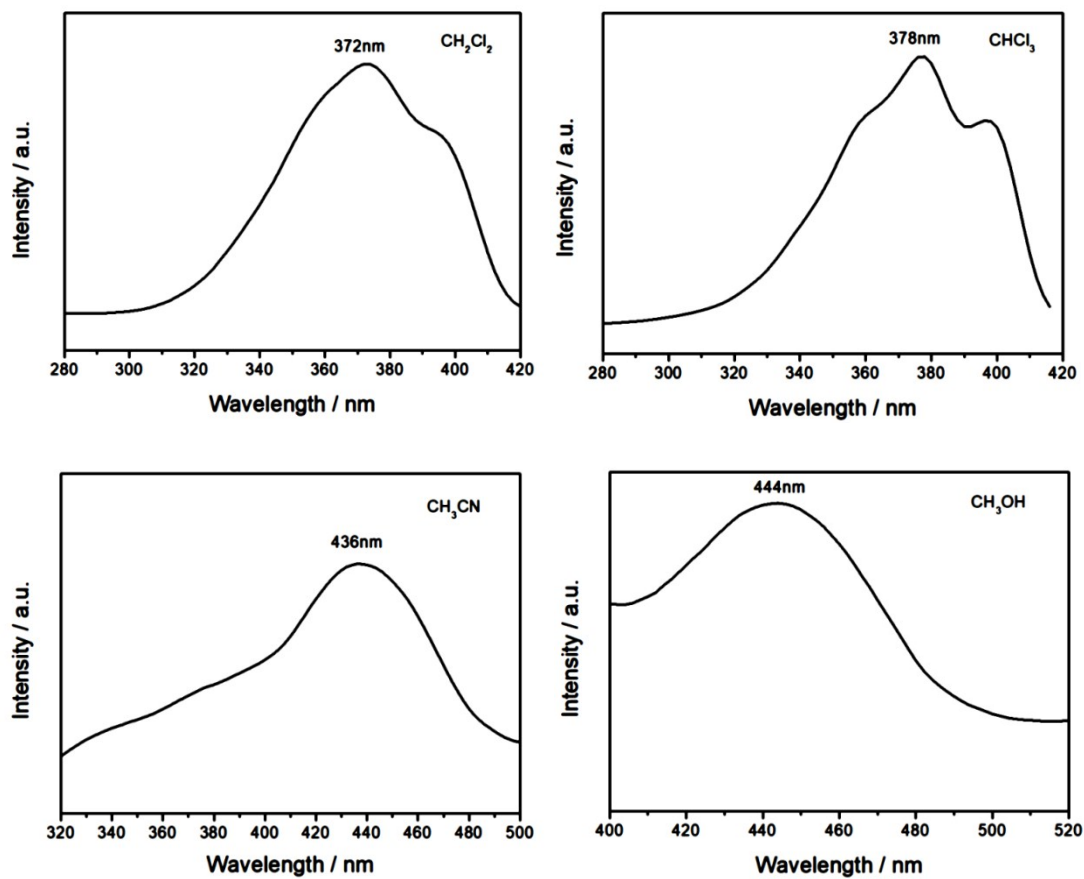

**Figure S4.** Excitation spectrum of  $\text{Ag}_{51}$  dissolved in  $\text{CH}_2\text{Cl}_2$ ,  $\text{CHCl}_3$ ,  $\text{CH}_3\text{CN}$  and  $\text{CH}_3\text{OH}$ .

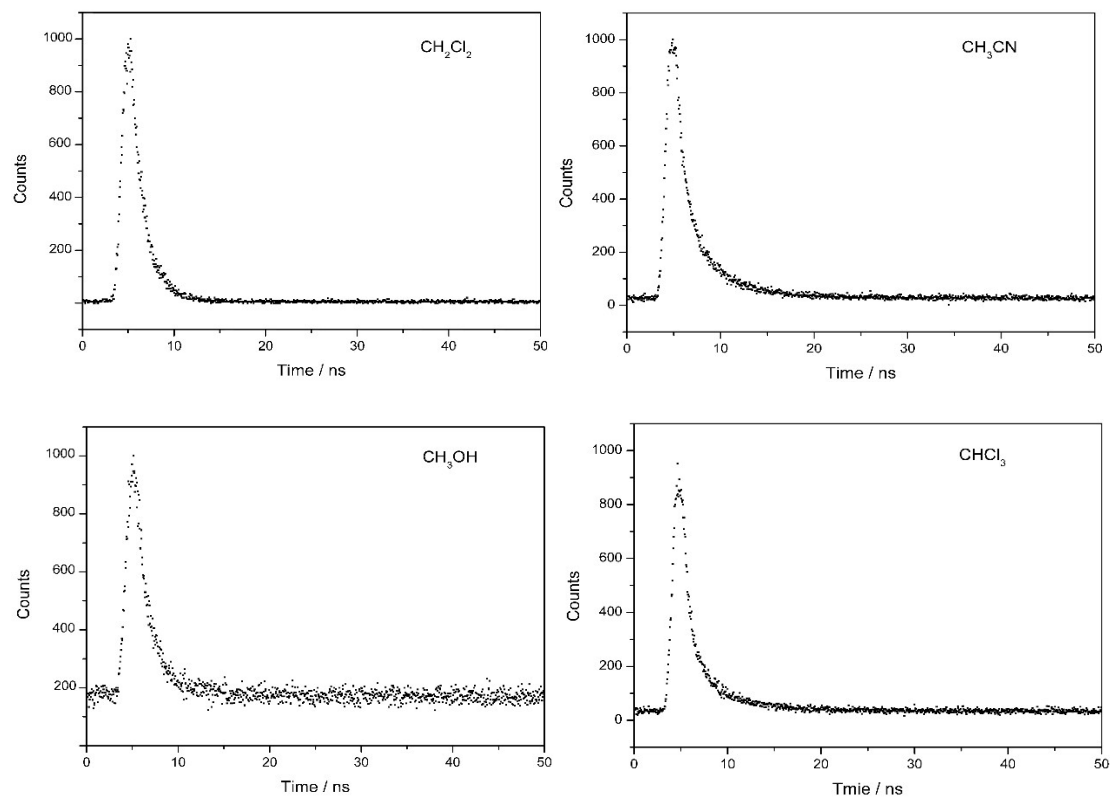

**Figure S5.** Fluorescence decay curves of **Ag<sub>51</sub>** dissolved in **CH<sub>3</sub>OH**, **CH<sub>3</sub>CN**, **CHCl<sub>3</sub>** and **CH<sub>2</sub>Cl<sub>2</sub>** at room temperature.

**Table 1.** The emission wavelengths and fluorescence lifetimes of **Ag<sub>51</sub>** dissolved in different solutions.

| Solution                        | $\lambda_{em}$ (nm) | $\tau$ (ns) |
|---------------------------------|---------------------|-------------|
| CH <sub>3</sub> OH              | 656                 | 1.63        |
| CH <sub>3</sub> CN              | 570                 | 1.87        |
| CHCl <sub>3</sub>               | 413, 437 and 469    | 1.51        |
| CH <sub>2</sub> Cl <sub>2</sub> | 418, 436 and 466    | 1.47        |

**Table 2.** Crystal data and structure refinement for **Ag<sub>51</sub>**

|                                                     |                                                              |
|-----------------------------------------------------|--------------------------------------------------------------|
| Empirical formula                                   | C <sub>192</sub> H <sub>288</sub> ClAg <sub>51</sub>         |
| Formula weight                                      | 8133.07                                                      |
| Crystal system                                      | Triclinic                                                    |
| Space group                                         | <i>P</i> -1                                                  |
| <i>a</i>                                            | 19.438(1) Å                                                  |
| <i>b</i>                                            | 19.512(1) Å                                                  |
| <i>c</i>                                            | 19.537(1) Å                                                  |
| $\alpha$                                            | 100.446(2)°                                                  |
| $\beta$                                             | 113.716(2)°                                                  |
| $\gamma$                                            | 102.272(2)°                                                  |
| <i>V</i>                                            | 6327.2(7) Å <sup>3</sup>                                     |
| <i>Z</i>                                            | 1                                                            |
| $\rho_{calc}$                                       | 2.127 Mg/m <sup>3</sup>                                      |
| Absorption coefficient                              | 3.036 mm <sup>-1</sup>                                       |
| F(000)                                              | 3841                                                         |
| Crystal size                                        | 0.32 x 0.24 x 0.16 mm <sup>3</sup>                           |
| Crystal color and habit                             | black block                                                  |
| Theta range for data collection                     | 2.049 to 24.742                                              |
| Index ranges                                        | -22 ≤ <i>h</i> ≤ 22, -22 ≤ <i>k</i> ≤ 22, -22 ≤ <i>l</i> ≤ 2 |
| Reflections collected                               | 78441                                                        |
| Independent reflections                             | 20535 [ <i>R</i> (int) = 0.0391]                             |
| Observed reflections ( <i>I</i> > 2σ( <i>I</i> ))   | 16771                                                        |
| Goodness-of-fit on F <sup>2</sup>                   | 1.043                                                        |
| Final <i>R</i> indices [ <i>I</i> > 2σ( <i>I</i> )] | <i>R</i> 1 = 0.1317, <i>wR</i> 2 = 0.3092                    |
| <i>R</i> indices (all data)                         | <i>R</i> 1 = 0.1573, <i>wR</i> 2 = 0.3323                    |
| Largest diff. peak and hole                         | 6.046 and -4.700 eÅ <sup>-3</sup>                            |
| CCDC number                                         | 1857040                                                      |

## References

- (S1) Jiang, Z.-G.; Shi, K.; Lin Y.-M.; Wang, Q.-M. *Chem. Commun.* **2014**, 50, 2353.
- (S2) Sheldrick, G. M. *Acta Crystallogr.* **2008**, A64, 112.
